# Supplementary material for: Tracing Tomorrow: young people’s preferences and values related to use of personal sensing to predict mental health, using a digital game methodology
Source: HighWire-hosted journal article supplement (doi:10.1136/bmjment-2023-300897), 2024-01-01
Supplement: bmjment-2023-300897supp001_data_supplement.pdf [file bmjment-2023-300897supp001_data_supplement.pdf]

## Online supplemental file for

### **Tracing Tomorrow: Young people's preferences and values related to use of personal sensing to predict mental health, using a digital game methodology**

Gabriela Pavarini, David M. Lyreskog, Danielle Newby, Jessica Lorimer, Vanessa Bennett, Edward Jacobs, Laura Winchester, Alejo J Nevado-Holgado, Iilina Singh

#### **This file includes:**

**Figure S1.** Screenshots from Tracing Tomorrow: user receives letter stating they are at risk for depression (A); user chooses whether to find more information about it (B); brief text is displayed on screen outlining what happened next (C)

**Table S1.** Information about mental health and digital phenotyping Tracing Tomorrow users can unlock via clickable “fact” icons

**Figure S2.** Plot showing the overall dropout rate for 16–18-year-olds from questions 1-11

**Table S2.** The dropout rate from questions 1-11 stratified by either gender, age or country of origin

**Figure S3.** Odds ratio for differences in responses between females and other gender groups (male, other, did not say) regarding disclosure target preference (A) and willingness to disclose in peer group (B), controlling for age and nation of residence.

**Figure S4.** Odds ratio for differences in responses between females and other gender groups (male, other, did not say) regarding information- and help-seeking preferences following disclosure of mental health risk status, controlling for age and nation of residence.

**Figure S5.** Odds ratio for differences in responses between females and other gender groups (male, other, did not say) regarding normative disposition with regards to digital phenotyping services performed by school (A), social media platform (B) and data sharing between schools and health services (C), controlling for age and nation of residence.

**Figure S6.** Odds ratio for differences in responses between females and other gender groups (male, other, did not say) regarding perceived impact of mental health risk information on self-understanding in the academic competence domain (A) and the moral domain (B).

**Table S3.** Summary of Question answers grouped by question theme and stratified by gender - Q2,9,10 (Information and support), Q3,5 (Trust to Disclose), Q4,6,11 (Normative disposition), Q7,8 (Self-understanding)

**Table S4.** Multinomial regression of gender effects to the questions from the Tracing Tomorrow game in adolescents aged 16-18, with the reference group as female – Q3,5 (Trust to disclose), Q7,8 (Self-understanding), Q2,9,10 (Information and Support), Q4,6,11 (Normative disposition)

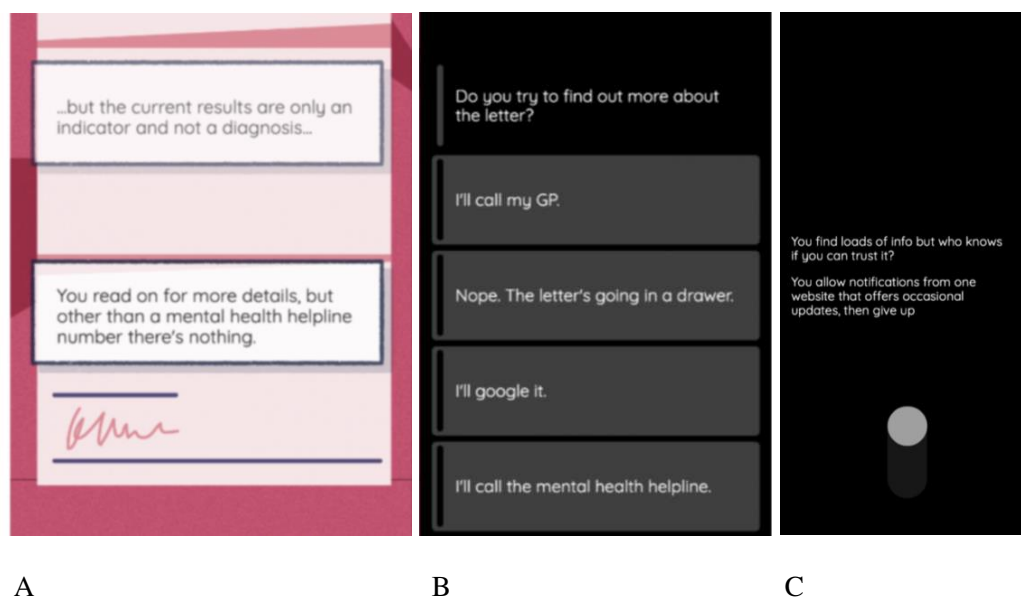

**Figure S1.** Screenshots from Tracing Tomorrow: user receives letter stating they are at risk for depression (A); user chooses whether to find more information about it (B); brief text is displayed on screen outlining what happened next (C)

**Table S1.** Information about mental health and digital phenotyping Tracing Tomorrow users can unlock via clickable “fact” icons

|        |                                                                                                                                                                                                  |
|--------|--------------------------------------------------------------------------------------------------------------------------------------------------------------------------------------------------|
| Fact 0 | Tap on INFO ICONS to gather more information throughout the game. Tap again to close.                                                                                                            |
| Fact 1 | Internet and mobile phone tech can be used to collect or monitor signs of mental wellbeing in someone.                                                                                           |
| Fact 2 | Depression can happen when anxiety about school or exams becomes common and too hard to cope with. Professional support could help.                                                              |
| Fact 3 | Googling, posting on social media, texting, and messaging, are useful to services that monitor mental health risk. But allowing access to this data increases other risks, such as your privacy. |
| Fact 4 | Risk predictions are just probabilities: having a high risk doesn't mean you'll definitely have mental health issues, and a low risk doesn't mean you definitely won't.                          |
| Fact 5 | Schools could collect student data to help improve mental health risk profiles, but this could have other consequences. Students could experience stigma around their mental health.             |
| Fact 6 | Enough sleep, eating healthily and exercising can all help your mental health and wellbeing.                                                                                                     |

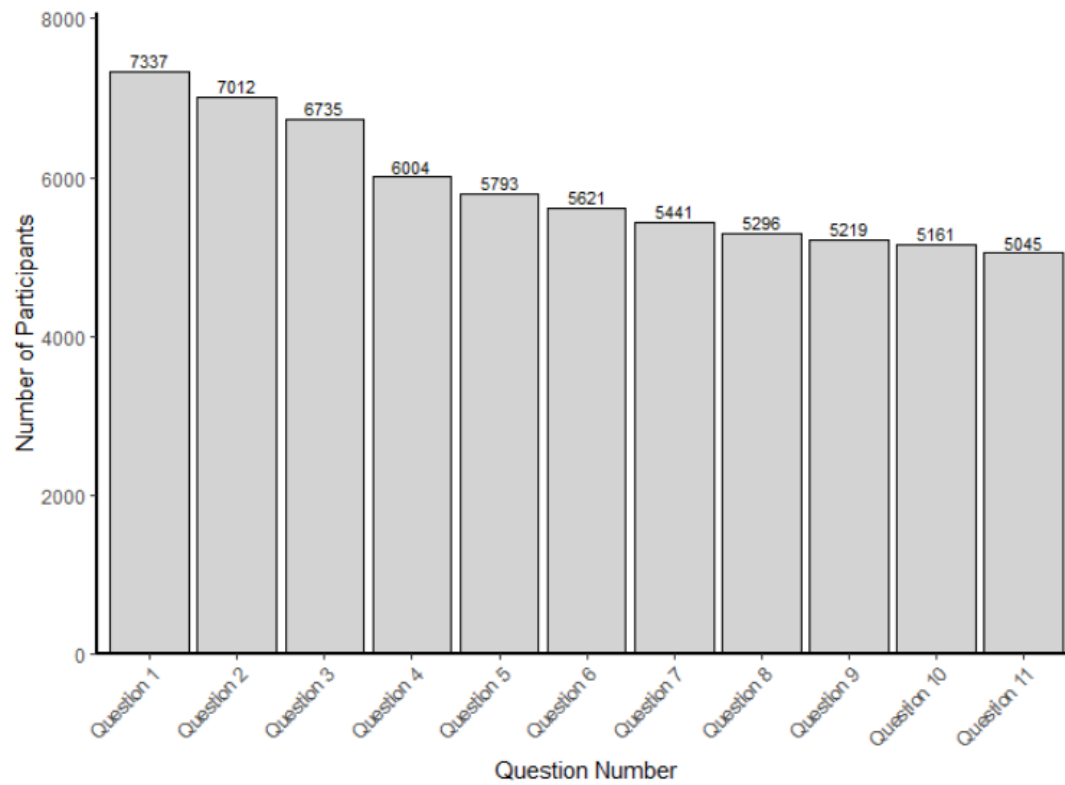

**Figure S2.** Plot showing the overall dropout rate for 16–18-year-olds from questions 1-11

**Table S2.** The dropout rate from questions 1-11 stratified by either gender, age or nation of origin

| Group  | Sub group        | Dropout rate (%) |
|--------|------------------|------------------|
| Gender | Did not say      | 36.99            |
|        | Female           | 29.09            |
|        | Male             | 37.19            |
|        | Other            | 23.3             |
| Age    | 16               | 32.94            |
|        | 17               | 31.15            |
|        | 18               | 28.18            |
| Nation | England          | 31.29            |
|        | Northern Ireland | 31.24            |
|        | Scotland         | 29.88            |
|        | Wales            | 30.91            |

### Gender differences

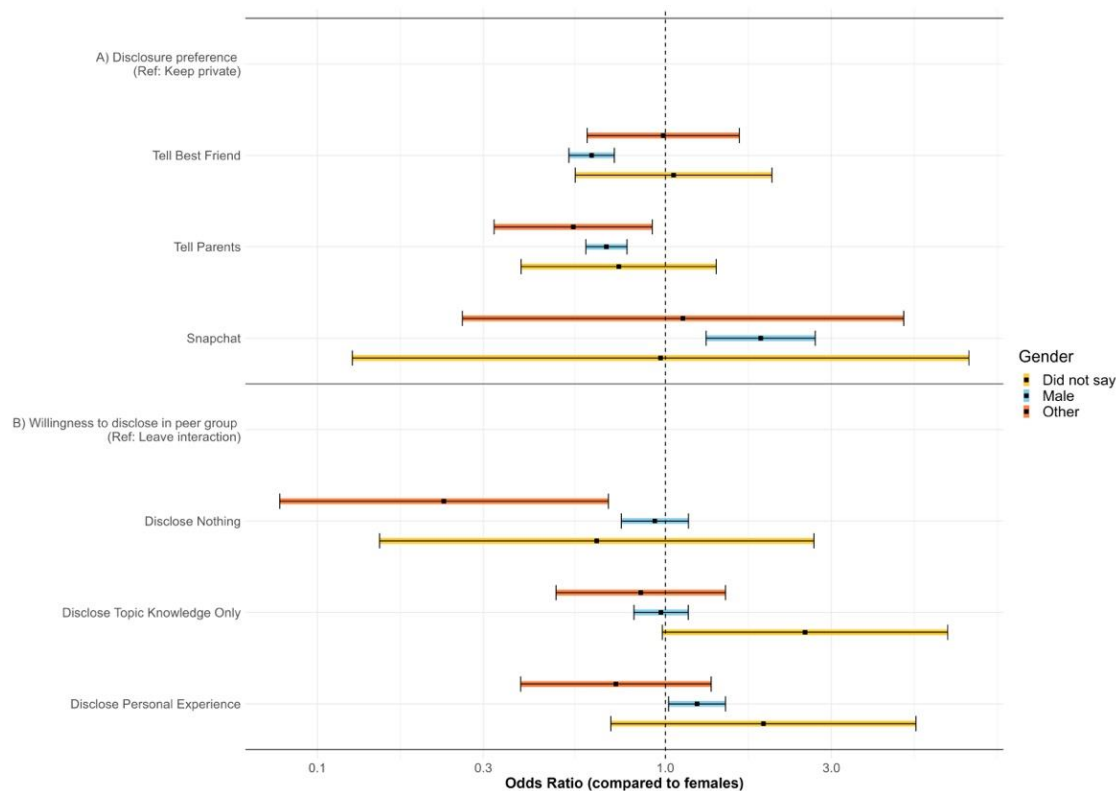

**Figure S3.** Odds ratio for differences in responses between females and other gender groups (male, other, did not say) regarding disclosure target preference (A) and willingness to disclose in peer group (B), controlling for age and nation of residence.

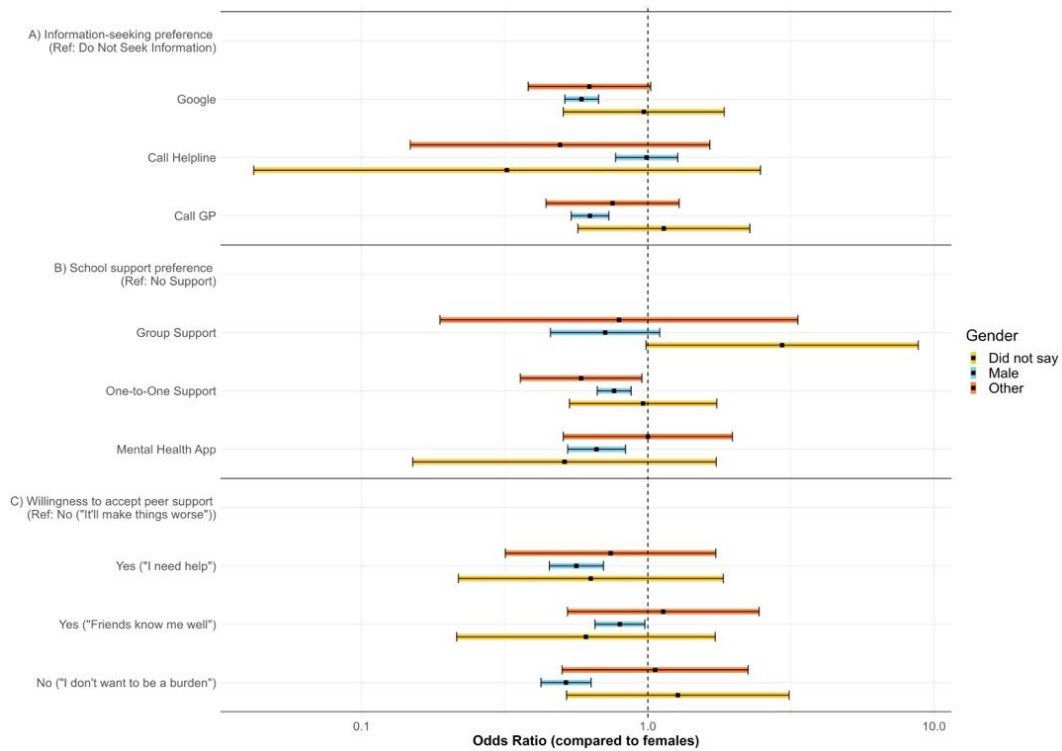

**Figure S4.** Odds ratio for differences in responses between females and other gender groups (male, other, did not say) regarding information- and help-seeking preferences following disclosure of mental health risk status, controlling for age and nation of residence.

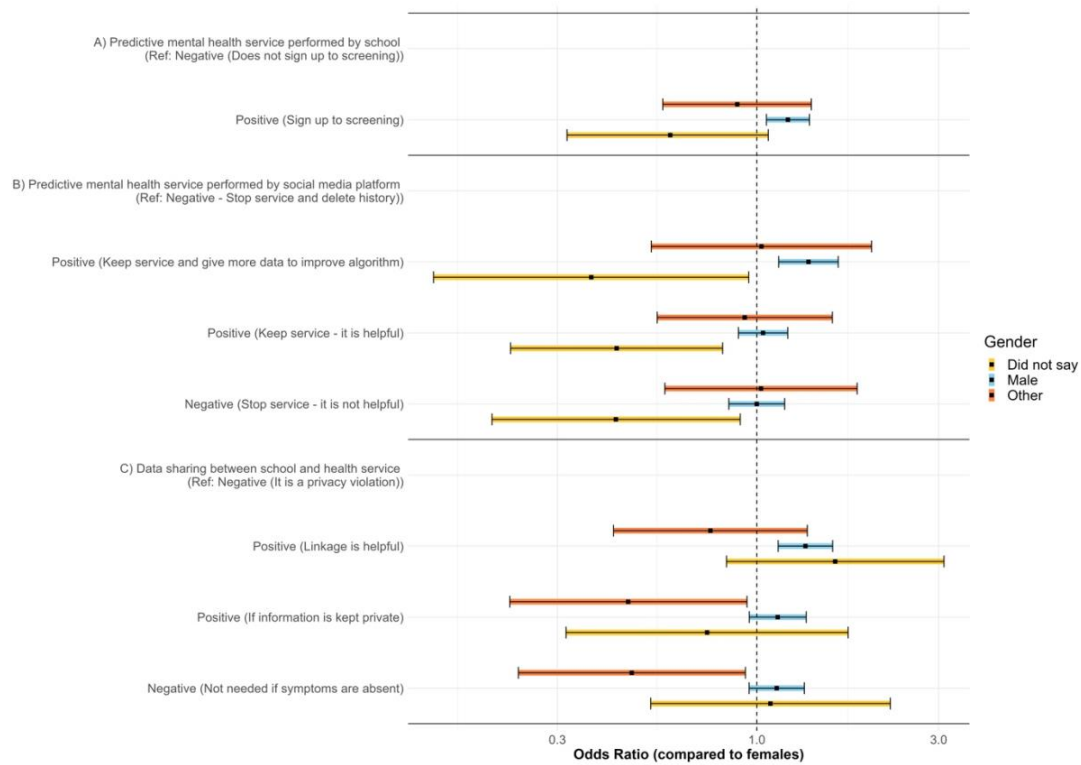

**Figure S5.** Odds ratio for differences in responses between females and other gender groups (male, other, did not say) regarding normative disposition with regards to digital phenotyping services performed by school (A), social media platform (B) and data sharing between schools and health services (C), controlling for age and nation of residence.



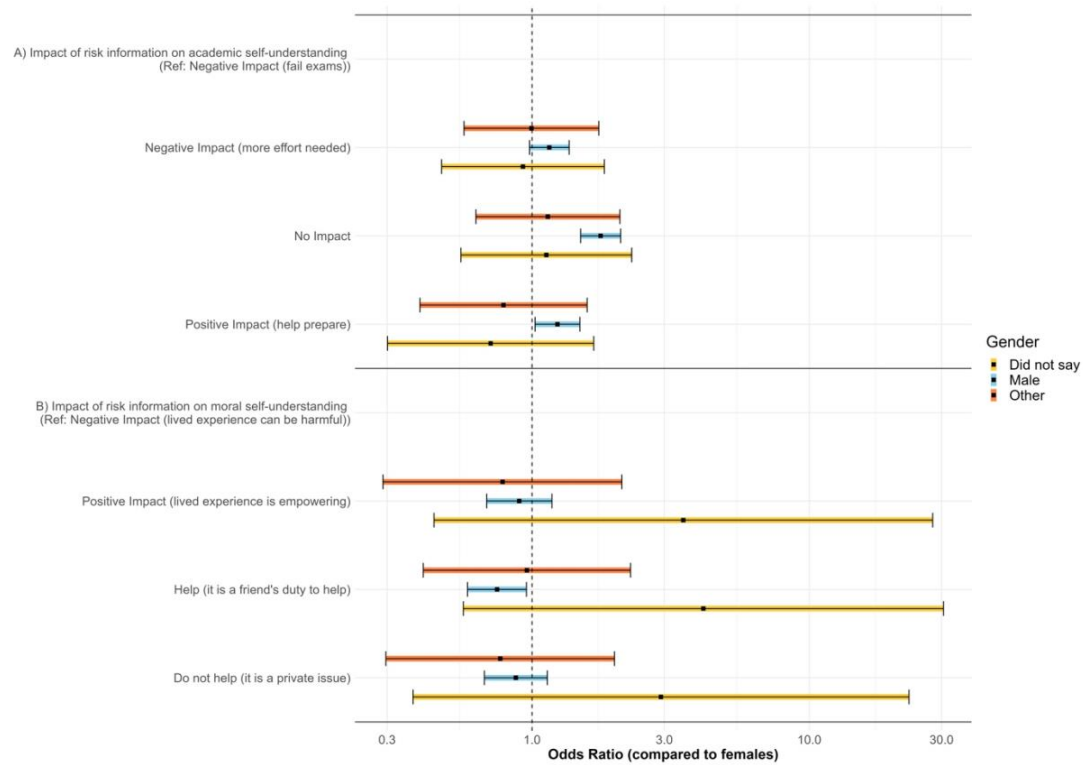

**Figure S6.** Odds ratio for differences in responses between females and other gender groups (male, other, did not say) regarding perceived impact of mental health risk information on self-understanding in the academic competence domain (A) and the moral domain (B).

**Table S3.** Summary of question answers grouped by question theme and stratified by gender - Q2,9,10 (Information and support), Q3,5 (Trust to Disclose), Q4,6,11 (Normative disposition), Q7,8 (Self-understanding)

| Question reference category                       | Female (n = 4984) | Male (n = 1858) | Other (n = 101) | Did Not Say (n = 69) | All          | p value | N    |
|---------------------------------------------------|-------------------|-----------------|-----------------|----------------------|--------------|---------|------|
| <b>Information and Support</b>                    |                   |                 |                 |                      |              |         |      |
| <i>Information-seeking preference (Q2)</i>        |                   |                 |                 |                      |              |         |      |
| Google                                            | 2466 (49.5%)      | 773 (41.6%)     | 43 (42.6%)      | 33 (47.8%)           | 3315 (47.3%) | <0.001  | 7012 |
| Call Helpline                                     | 218 (4.37%)       | 118 (6.35%)     | 3 (2.97%)       | 1 (1.45%)            | 340 (4.85%)  |         |      |
| Call GP                                           | 1372 (27.5%)      | 467 (25.1%)     | 29 (28.7%)      | 22 (31.9%)           | 1890 (27.0%) |         |      |
| Do Not Seek Information                           | 928 (18.6%)       | 500 (26.9%)     | 26 (25.7%)      | 13 (18.8%)           | 1467 (20.9%) |         |      |
| <i>School support preference (Q9)</i>             |                   |                 |                 |                      |              |         |      |
| Group support                                     | 94 (2.46%)        | 27 (2.13%)      | 2 (2.50%)       | 4 (7.69%)            | 127 (2.43%)  | <0.001  | 5219 |
| One-to-One Support                                | 1873 (49.0%)      | 561 (44.2%)     | 29 (36.2%)      | 25 (48.1%)           | 2488 (47.7%) |         |      |
| Mental Health App                                 | 411 (10.8%)       | 109 (8.60%)     | 11 (13.8%)      | 3 (5.77%)            | 534 (10.2%)  |         |      |
| No Support                                        | 1441 (37.7%)      | 571 (45.0%)     | 38 (47.5%)      | 20 (38.5%)           | 2070 (39.7%) |         |      |
| <i>Willingness to accept peer support (Q10)</i>   |                   |                 |                 |                      |              |         |      |
| Yes ("I need help")                               | 891 (23.6%)       | 251 (20.0%)     | 14 (17.5%)      | 8 (16.3%)            | 1164 (22.6%) | <0.001  | 5161 |
| Yes ("Friends know me well")                      | 1046 (27.7%)      | 418 (33.4%)     | 25 (31.2%)      | 9 (18.4%)            | 1498 (29.0%) |         |      |
| No ("I don't want to be a burden")                | 1421 (37.6%)      | 372 (29.7%)     | 32 (40.0%)      | 26 (53.1%)           | 1851 (35.9%) |         |      |
| No ("It will make things worse")                  | 421 (11.1%)       | 212 (16.9%)     | 9 (11.2%)       | 6 (12.2%)            | 648 (12.6%)  |         |      |
| <b>Trust to disclose</b>                          |                   |                 |                 |                      |              |         |      |
| <i>Disclosure preference (Q3)</i>                 |                   |                 |                 |                      |              |         |      |
| Tell Best Friend                                  | 1518 (31.6%)      | 460 (26.1%)     | 39 (39.4%)      | 24 (36.9%)           | 2041 (30.3%) | <0.001  | 6735 |
| Tell Parents                                      | 2234 (46.5%)      | 750 (42.6%)     | 32 (32.3%)      | 25 (38.5%)           | 3041 (45.2%) |         |      |
| Snapchat                                          | 68 (1.41%)        | 63 (3.58%)      | 2 (2.02%)       | 1 (1.54%)            | 134 (1.99%)  |         |      |
| Keep private                                      | 989 (20.6%)       | 489 (27.8%)     | 26 (26.3%)      | 15 (23.1%)           | 1519 (22.6%) |         |      |
| <i>Willingness to disclose in peer group (Q5)</i> |                   |                 |                 |                      |              |         |      |
| Disclose Nothing                                  | 637 (15.2%)       | 195 (13.5%)     | 4 (4.65%)       | 3 (5.17%)            | 839 (14.5%)  | <0.001  | 5793 |
| Disclose Topic Knowledge Only                     | 1793 (42.7%)      | 575 (39.8%)     | 42 (48.8%)      | 34 (58.6%)           | 2444 (42.2%) |         |      |
| Disclose Personal Experience                      | 1118 (26.6%)      | 456 (31.5%)     | 22 (25.6%)      | 16 (27.6%)           | 1612 (27.8%) |         |      |
| Leave Interaction                                 | 655 (15.6%)       | 220 (15.2%)     | 18 (20.9%)      | 5 (8.62%)            | 898 (15.5%)  |         |      |

|                                                                                 |              |             |            |            |              |        |      |
|---------------------------------------------------------------------------------|--------------|-------------|------------|------------|--------------|--------|------|
| <b>Normative disposition</b>                                                    |              |             |            |            |              |        |      |
| <i>Predictive mental health service performed by social media platform (Q4)</i> |              |             |            |            |              |        |      |
| Positive (Keep service and give more data to improve algorithm)                 | 608 (14.0%)  | 269 (17.9%) | 13 (14.6%) | 5 (8.62%)  | 895 (14.9%)  | 0.002  | 6004 |
| Positive (Keep service – it is helpful)                                         | 1448 (33.2%) | 488 (32.6%) | 28 (31.5%) | 14 (24.1%) | 1978 (32.9%) |        |      |
| Negative (Stop service – it is not helpful)                                     | 932 (21.4%)  | 303 (20.2%) | 20 (22.5%) | 9 (15.5%)  | 1264 (21.1%) |        |      |
| Negative (Stop service and delete history)                                      | 1370 (31.4%) | 439 (29.3%) | 28 (31.5%) | 30 (51.7%) | 1867 (31.1%) |        |      |
| <i>Data sharing between school and health service (Q6)</i>                      |              |             |            |            |              |        |      |
| Positive (Linkage is helpful)                                                   | 739 (18.1%)  | 302 (21.7%) | 15 (18.1%) | 15 (26.8%) | 1071 (19.1%) | 0.003  | 5621 |
| Positive (if information is kept private)                                       | 728 (17.8%)  | 256 (18.4%) | 9 (10.8%)  | 7 (12.5%)  | 1000 (17.8%) |        |      |
| Negative (Not needed if symptoms are absent)                                    | 798 (19.5%)  | 277 (19.9%) | 10 (12.0%) | 11 (19.6%) | 1096 (19.5%) |        |      |
| Negative (It is a privacy violation)                                            | 1828 (44.7%) | 554 (39.9%) | 49 (59.0%) | 23 (41.1%) | 2454 (43.7%) |        |      |
| <i>Predictive mental health service performed by school (Q11)</i>               |              |             |            |            |              |        |      |
| Positive (Sign up to screening)                                                 | 1842 (49.8%) | 666 (54.5%) | 37 (46.8%) | 17 (37.0%) | 2562 (50.8%) | 0.007  | 5045 |
| Negative (Does not sign up to screening)                                        | 1855 (50.2%) | 557 (45.5%) | 42 (53.2%) | 29 (63.0%) | 2483 (49.2%) |        |      |
| <b>Impact of risk information on self-understanding</b>                         |              |             |            |            |              |        |      |
| <i>Academic (Q7)</i>                                                            |              |             |            |            |              |        |      |
| Negative impact (fail exams)                                                    | 1527 (38.4%) | 419 (31.4%) | 31 (38.8%) | 22 (40.0%) | 1999 (36.7%) | <0.001 | 5441 |
| Negative Impact (more effort needed)                                            | 1034 (26.0%) | 329 (24.7%) | 21 (26.2%) | 14 (25.5%) | 1398 (25.7%) |        |      |
| No Impact                                                                       | 732 (18.4%)  | 356 (26.7%) | 17 (21.2%) | 12 (21.8%) | 1117 (20.5%) |        |      |
| Positive Impact (help prepare)                                                  | 680 (17.1%)  | 229 (17.2%) | 11 (13.8%) | 7 (12.7%)  | 927 (17.0%)  |        |      |
| <i>Moral (Q8)</i>                                                               |              |             |            |            |              |        |      |
| Positive Impact (lived experience is empowering)                                | 660 (17.0%)  | 242 (18.8%) | 12 (15.0%) | 9 (17.0%)  | 923 (17.4%)  | 0.106  | 5296 |
| Help (it is a friend's duty to help)                                            | 2065 (53.3%) | 627 (48.6%) | 46 (57.5%) | 33 (62.3%) | 2771 (52.3%) |        |      |
| Negative Impact (lived experience can be harmful)                               | 256 (6.61%)  | 105 (8.14%) | 6 (7.50%)  | 1 (1.89%)  | 368 (6.95%)  |        |      |
| Do not help (privacy)                                                           | 892 (23.0%)  | 316 (24.5%) | 16 (20.0%) | 10 (18.9%) | 1234 (23.3%) |        |      |

**Table S4.** Multinomial regression of gender effects to the questions from the Tracing Tomorrow game in adolescents aged 16-18, with the reference group as female – Q3,5 (Trust to disclose), Q7,8 (Self-understanding), Q2,9,10 (Information and Support), Q4,6,11 (Normative disposition)

| Question reference category                                            | Category                                         | Male  |             |              | Other |             |              | Did Not Say |              |         |
|------------------------------------------------------------------------|--------------------------------------------------|-------|-------------|--------------|-------|-------------|--------------|-------------|--------------|---------|
|                                                                        |                                                  | OR    | 95%CI       | p-value      | OR    | 95%CI       | p-value      | OR          | 95%CI        | p-value |
| <b>Trust to disclose</b>                                               |                                                  |       |             |              |       |             |              |             |              |         |
| Disclosure preference (Q3)<br>(Ref: Keep private)                      | Best Friend                                      | 0.614 | 0.528-0.714 | < 0.001      | 0.986 | 0.596-1.631 | 0.957        | 1.056       | 0.551-2.024  | 0.869   |
|                                                                        | Parents                                          | 0.677 | 0.591-0.776 | < 0.001      | 0.544 | 0.322-0.917 | <b>0.022</b> | 0.735       | 0.385-1.4    | 0.349   |
|                                                                        | Snapchat                                         | 1.879 | 1.309-2.695 | <b>0.001</b> | 1.123 | 0.261-4.838 | 0.876        | 0.969       | 0.126-7.454  | 0.976   |
| Willingness to disclose in peer group (Q5)<br>(Ref: Leave interaction) | Disclose Nothing                                 | 0.933 | 0.747-1.165 | 0.539        | 0.231 | 0.078-0.686 | <b>0.008</b> | 0.635       | 0.151-2.672  | 0.536   |
|                                                                        | Disclose Topic Knowledge Only                    | 0.971 | 0.812-1.163 | 0.752        | 0.85  | 0.485-1.489 | 0.571        | 2.519       | 0.98-6.475   | 0.055   |
|                                                                        | Full Disclosure                                  | 1.233 | 1.022-1.489 | <b>0.029</b> | 0.721 | 0.384-1.355 | 0.309        | 1.914       | 0.697-5.251  | 0.208   |
| <b>Impact of risk information on self-understanding</b>                |                                                  |       |             |              |       |             |              |             |              |         |
| Academic (Q7)<br>(Ref: Negative impact (fail exams))                   | Negative Impact (more effort needed)             | 1.154 | 0.979-1.361 | 0.088        | 0.995 | 0.568-1.741 | 0.985        | 0.927       | 0.472-1.822  | 0.827   |
|                                                                        | No Impact                                        | 1.767 | 1.496-2.088 | < 0.001      | 1.14  | 0.627-2.075 | 0.667        | 1.126       | 0.554-2.288  | 0.743   |
|                                                                        | Positive Impact (help prepare)                   | 1.235 | 1.026-1.487 | <b>0.025</b> | 0.789 | 0.394-1.58  | 0.504        | 0.709       | 0.301-1.669  | 0.431   |
| Moral (Q8)<br>(Ref: Do not help (Negative experience can be harmful))  | Positive Impact (lived experience is empowering) | 0.899 | 0.686-1.18  | 0.443        | 0.783 | 0.29-2.108  | 0.628        | 3.512       | 0.443-27.858 | 0.235   |
|                                                                        | Help (it is a friend's duty to help)             | 0.748 | 0.585-0.955 | <b>0.02</b>  | 0.958 | 0.405-2.265 | 0.921        | 4.149       | 0.565-30.467 | 0.162   |
|                                                                        | Do not help (privacy)                            | 0.874 | 0.673-1.135 | 0.312        | 0.768 | 0.297-1.983 | 0.585        | 2.916       | 0.372-22.888 | 0.309   |

|                                                                                                               |                                                                                     |                                                                                                       |                                                                 |             |                   |              |             |              |       |             |              |
|---------------------------------------------------------------------------------------------------------------|-------------------------------------------------------------------------------------|-------------------------------------------------------------------------------------------------------|-----------------------------------------------------------------|-------------|-------------------|--------------|-------------|--------------|-------|-------------|--------------|
| <b>Information and support</b>                                                                                | Information-seeking preference (Q2)<br>(Ref: Do Not Seek Information)               | Google                                                                                                | 0.587                                                           | 0.513-0.673 | <b>&lt; 0.001</b> | 0.625        | 0.382-1.024 | 0.062        | 0.969 | 0.507-1.85  | 0.923        |
|                                                                                                               |                                                                                     | Call Helpline                                                                                         | 0.991                                                           | 0.772-1.273 | 0.945             | 0.494        | 0.148-1.648 | 0.251        | 0.322 | 0.042-2.476 | 0.276        |
|                                                                                                               |                                                                                     | Call GP                                                                                               | 0.628                                                           | 0.54-0.731  | <b>&lt; 0.001</b> | 0.753        | 0.441-1.287 | 0.3          | 1.138 | 0.57-2.272  | 0.713        |
|                                                                                                               | School support preference (Q9)<br>(Ref: No support)                                 | Group Support                                                                                         | 0.71                                                            | 0.457-1.101 | 0.126             | 0.794        | 0.188-3.345 | 0.753        | 2.947 | 0.986-8.813 | 0.053        |
|                                                                                                               |                                                                                     | One-to-one Support                                                                                    | 0.763                                                           | 0.666-0.874 | <b>&lt; 0.001</b> | 0.585        | 0.359-0.953 | <b>0.031</b> | 0.963 | 0.533-1.742 | 0.902        |
|                                                                                                               |                                                                                     | Mental Health App                                                                                     | 0.662                                                           | 0.525-0.836 | <b>0.001</b>      | 1.001        | 0.507-1.976 | 0.998        | 0.512 | 0.151-1.734 | 0.282        |
|                                                                                                               | Willingness to accept peer support (Q10)<br>(Ref: No ("It will make things worse")) | Yes ("I need help")                                                                                   | 0.563                                                           | 0.453-0.7   | <b>&lt; 0.001</b> | 0.742        | 0.318-1.729 | 0.489        | 0.632 | 0.218-1.836 | 0.399        |
|                                                                                                               |                                                                                     | Yes ("Friends know me well")                                                                          | 0.799                                                           | 0.654-0.977 | <b>0.029</b>      | 1.133        | 0.524-2.45  | 0.751        | 0.608 | 0.215-1.721 | 0.349        |
|                                                                                                               |                                                                                     | No ("I don't want to be a burden")                                                                    | 0.518                                                           | 0.424-0.634 | <b>&lt; 0.001</b> | 1.061        | 0.502-2.242 | 0.877        | 1.274 | 0.52-3.119  | 0.596        |
|                                                                                                               | <b>Normative disposition</b>                                                        | Predictive service by social media platform (Q4)<br>(Ref: Negative (Stop service and delete history)) | Positive (Keep service and give more data to improve algorithm) | 1.367       | 1.142-1.636       | <b>0.001</b> | 1.029       | 0.529-2.001  | 0.933 | 0.368       | 0.142-0.953  |
| Positive (Keep service – it is helpful)                                                                       |                                                                                     |                                                                                                       | 1.039                                                           | 0.895-1.206 | 0.617             | 0.93         | 0.548-1.579 | 0.788        | 0.429 | 0.226-0.814 | <b>0.01</b>  |
| Negative (Stop service – it is not helpful)                                                                   |                                                                                     |                                                                                                       | 1                                                               | 0.845-1.184 | 1                 | 1.026        | 0.574-1.834 | 0.93         | 0.427 | 0.202-0.905 | <b>0.026</b> |
| Data sharing between school and health service (Q6) (Ref: Negative (It is a privacy violation))               |                                                                                     | Positive (Linkage is helpful)                                                                         | 1.342                                                           | 1.138-1.582 | <b>&lt; 0.001</b> | 0.756        | 0.421-1.357 | 0.349        | 1.606 | 0.833-3.098 | 0.157        |
|                                                                                                               |                                                                                     | Positive (if information is kept private)                                                             | 1.135                                                           | 0.956-1.348 | 0.148             | 0.46         | 0.225-0.943 | <b>0.034</b> | 0.741 | 0.316-1.736 | 0.49         |
|                                                                                                               |                                                                                     | Negative (Not needed if symptoms are absent)                                                          | 1.128                                                           | 0.955-1.333 | 0.157             | 0.47         | 0.237-0.934 | <b>0.031</b> | 1.086 | 0.527-2.241 | 0.823        |
| Predictive mental health service performed by school (Q11)<br>(Ref: Negative (Does not sign up to screening)) |                                                                                     | Positive (Sign up to screening)                                                                       | 1.207                                                           | 1.06-1.375  | <b>0.004</b>      | 0.889        | 0.567-1.39  | 0.607        | 0.593 | 0.318-1.072 | 0.089        |

**p values < 0.05 are in bold**
